# Supplementary material
Source: PubMed Central journal article supplement (PMC2782628)
Supplement: NIHMS105979-supplement-1_si_001.pdf [file NIHMS105979-supplement-1_si_001.pdf]

## Supporting Information

### **Design and Synthesis of 2-Amino-4-methylpyridine Analogues as Inhibitors for Inducible Nitric Oxide Synthase and *in vivo* Evaluation of [<sup>18</sup>F]6-(2-Fluoropropyl)-4-methyl-pyridin-2-amine as a Potential PET Tracer for Inducible Nitric Oxide Synthase**

*Dong Zhou, Hsiaoju Lee, Justin M. Rothfuss, Delphine L. Chen, Datta E. Ponde,*

*Michael J. Welch, and Robert H. Mach*

Table of contents:

Table S1. Combustion analysis data.....S2

Table S1. Combustion analysis data

| Compound  | Molecular formula                  | C (%)  |       | H (%)  |       | N (%)  |       |
|-----------|------------------------------------|--------|-------|--------|-------|--------|-------|
|           |                                    | Calcd. | Found | Calcd. | Found | Calcd. | Found |
| <b>9</b>  | $C_9H_{13}FN_2$                    | 64.26  | 64.17 | 7.79   | 7.86  | 16.65  | 16.75 |
| <b>11</b> | $C_{11}H_{14}N_2O_4$               | 55.46  | 55.05 | 5.92   | 5.87  | 11.76  | 11.37 |
| <b>13</b> | $C_{12}H_{18}N_2O_5$               | 53.33  | 53.82 | 6.71   | 6.80  | 10.36  | 10.57 |
| <b>15</b> | $C_{11}H_{17}FN_2O$                | 62.24  | 61.67 | 8.07   | 8.05  | 13.20  | 13.26 |
| <b>16</b> | $C_{10}H_{16}N_2O$                 | 65.03  | 65.03 | 8.49   | 8.49  | 16.85  | 16.84 |
| <b>18</b> | $C_{11}H_{15}FN_2O_4$<br>(oxalate) | 51.16  | 51.89 | 5.85   | 5.97  | 10.85  | 11.12 |
| <b>20</b> | $C_{12}H_{17}FN_2O_4$              | 52.94  | 53.03 | 6.29   | 6.32  | 10.29  | 10.36 |
| <b>24</b> | $C_{12}H_{16}N_2O_4$<br>(oxalate)  | 57.13  | 58.22 | 6.39   | 6.61  | 11.10  | 11.36 |
| <b>27</b> | $C_{12}H_{20}N_2O$                 | 69.19  | 67.99 | 9.68   | 9.58  | 13.45  | 13.55 |
| <b>30</b> | $C_{13}H_{19}FN_2O_4$<br>(oxalate) | 54.54  | 54.83 | 6.69   | 6.75  | 9.78   | 9.65  |
| <b>33</b> | $C_{14}H_{22}N_2O_4S$<br>(oxalate) | 53.48  | 53.39 | 7.05   | 7.02  | 8.91   | 8.79  |
| <b>38</b> | $C_{15}H_{24}N_2O_5S$              | 52.31  | 52.43 | 7.02   | 7.08  | 8.13   | 8.16  |
